# Supplementary material
Source: Springer Nature journal article supplement (https://www.springermedizin.de/resource/supplementary/13063_2012_1401_MOESM5_ESM.pdf/9619954)

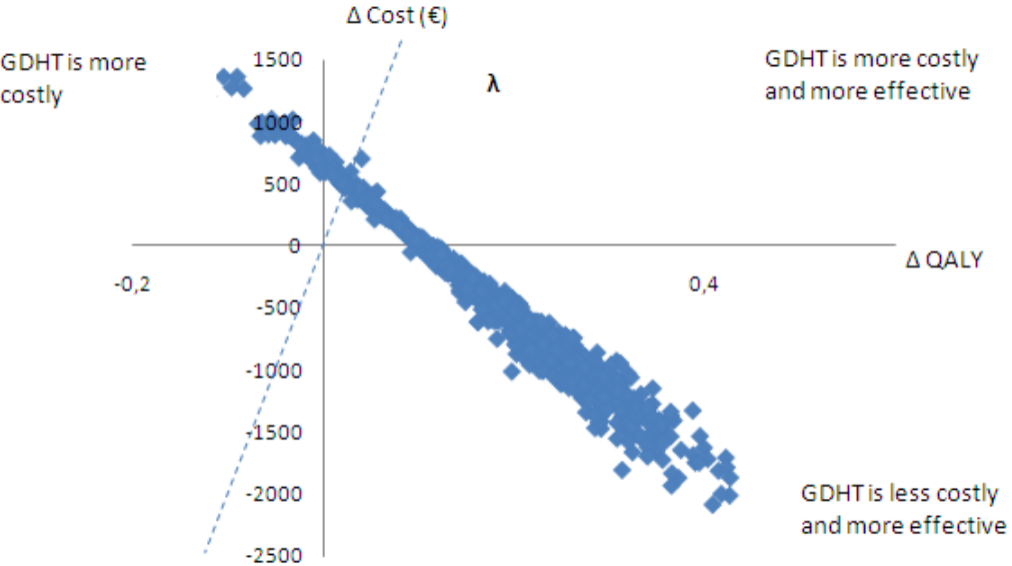

Supplement: MOESM5 [file 9619954]
